# Supplementary material for: Neophathalides A and B, two pairs of unusual phthalide analog enantiomers from Ligusticum chuanxiong
Source: Royal Society of Chemistry journal article supplement (doi:10.1039/d0ob01014f), 2020-01-01
Supplement: d0ob01014f1.pdf [file d0ob01014f1.pdf]

***Supporting information***

**Neophthalides A and B, two pairs of unusual phthalide  
analog enantiomers from *Ligusticum chuanxiong***

Xu Zhang, Hai-Wei Yan, Zi-ming Feng, Ya-nan Yang, Jian-shuang Jiang, Pei-cheng Zhang\*

State Key Laboratory of Bioactive Substance and Function of Natural Medicines, Institute of Materia Medica, Chinese Academy of Medical Sciences and Peking Union Medical College, Beijing 100050, People's Republic of China

Corresponding author. Tel: +86-10-63165231. Fax: +86-10-63017757.

E-mail: pczhang@imm.ac.cn

## Table of Contents

| No. | Contents                                                                   | Compounds | Page |
|-----|----------------------------------------------------------------------------|-----------|------|
| 1   | The $^1\text{H}$ NMR spectrum in methanol- $d_4$ (500 MHz)                 | 1         | S3   |
| 2   | The $^{13}\text{C}$ NMR spectrum in methanol- $d_4$ (125 MHz)              | 1         | S3   |
| 3   | The $^1\text{H}$ NMR spectrum in DMSO- $d_6$ (500 MHz)                     | 1         | S4   |
| 4   | The $^{13}\text{C}$ NMR spectrum in DMSO- $d_6$ (125 MHz)                  | 1         | S4   |
| 5   | The HSQC spectrum in methanol- $d_4$ (500 MHz)                             | 1         | S5   |
| 6   | The HMBC spectrum in methanol- $d_4$ (500 MHz)                             | 1         | S5   |
| 7   | The $^1\text{H}$ - $^1\text{H}$ COSY spectrum in methanol- $d_4$ (500 MHz) | 1         | S6   |
| 8   | The 1D NOE spectrum in methanol- $d_4$ (600 MHz)                           | 1         | S6   |
| 9   | The UV spectrum in methanol                                                | 1         | S7   |
| 10  | The IR spectrum                                                            | 1         | S7   |
| 11  | The ECD spectrum in methanol                                               | 1a        | S8   |
| 12  | The ECD spectrum in methanol                                               | 1b        | S8   |
| 13  | The HR-ESI-MS spectrum                                                     | 1         | S9   |
| 14  | The Chiral separation on preparative HPLC                                  | 1         | S9   |
| 15  | The $^1\text{H}$ NMR spectrum in methanol- $d_4$ (500 MHz)                 | 2         | S10  |
| 16  | The $^{13}\text{C}$ NMR spectrum in methanol- $d_4$ (125 MHz)              | 2         | S10  |
| 17  | The HSQC spectrum in methanol- $d_4$ (500 MHz)                             | 2         | S11  |
| 18  | The HMBC spectrum in methanol- $d_4$ (500 MHz)                             | 2         | S11  |
| 19  | The $^1\text{H}$ - $^1\text{H}$ COSY spectrum in methanol- $d_4$ (500 MHz) | 2         | S12  |
| 20  | The UV spectrum in methanol                                                | 2         | S12  |
| 21  | The IR spectrum                                                            | 2         | S13  |
| 22  | The ECD spectrum in methanol                                               | 2a        | S13  |
| 23  | The ECD spectrum in methanol                                               | 2b        | S14  |
| 24  | The HR-ESI-MS spectrum (negative ion)                                      | 2         | S14  |
| 25  | The HR-ESI-MS spectrum (positive ion)                                      | 2         | S15  |
| 26  | The Chiral separation on preparative HPLC                                  | 2         | S15  |
| S1  | Seven optimized conformations                                              | 1a        | S16  |
| S2  | Seven optimized conformations                                              | 2a        | S17  |

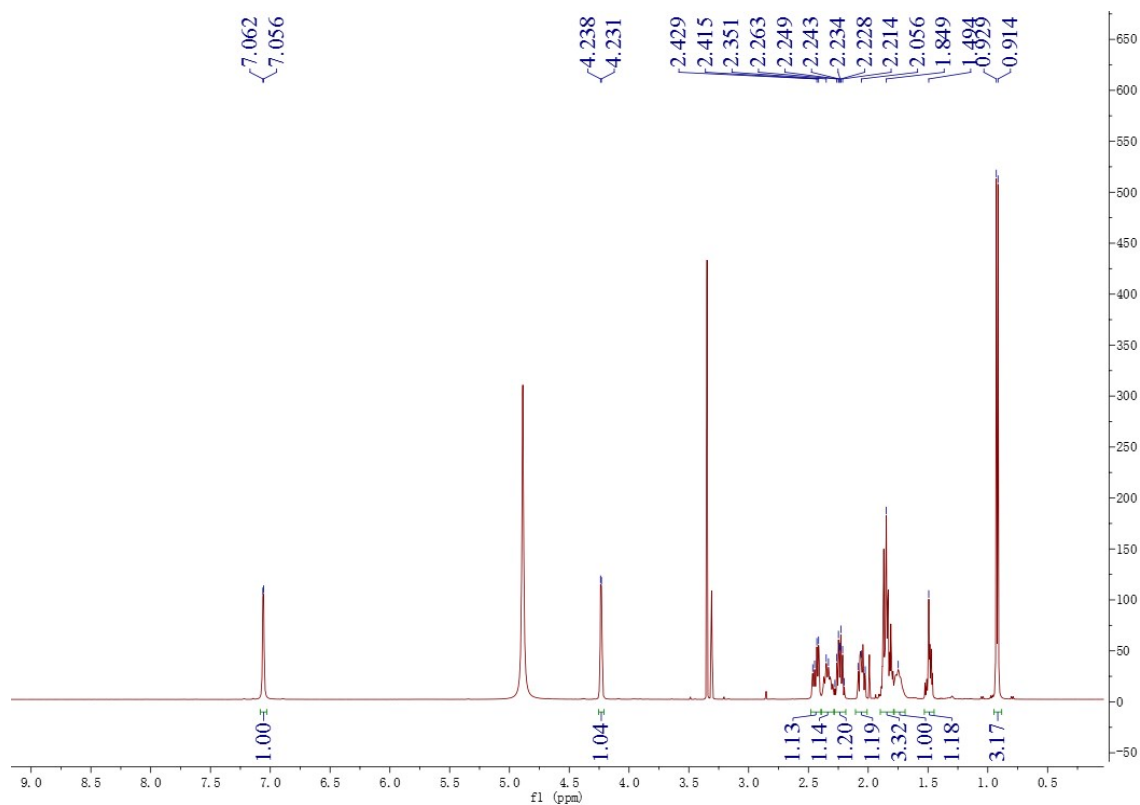

**Figure S1.** The  $^1\text{H}$  NMR spectrum of compound **1** in methanol- $d_4$

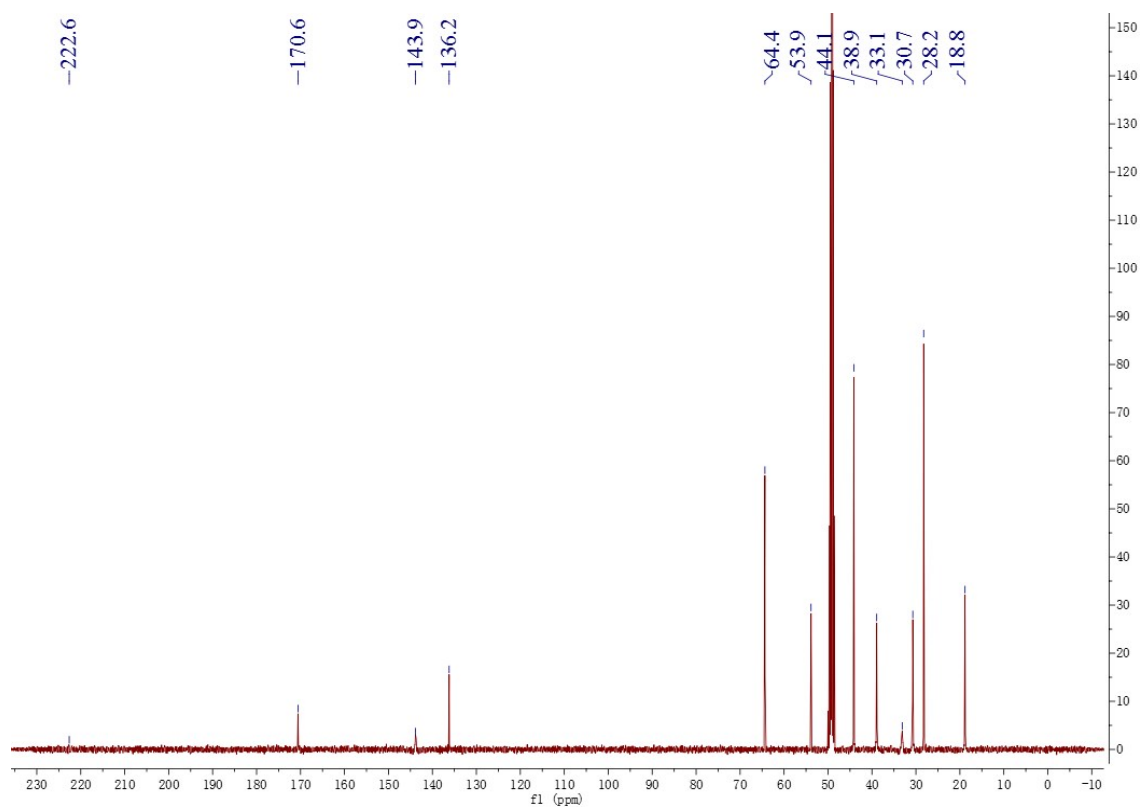

**Figure S2.** The  $^{13}\text{C}$  NMR spectrum of compound **1** in methanol- $d_4$

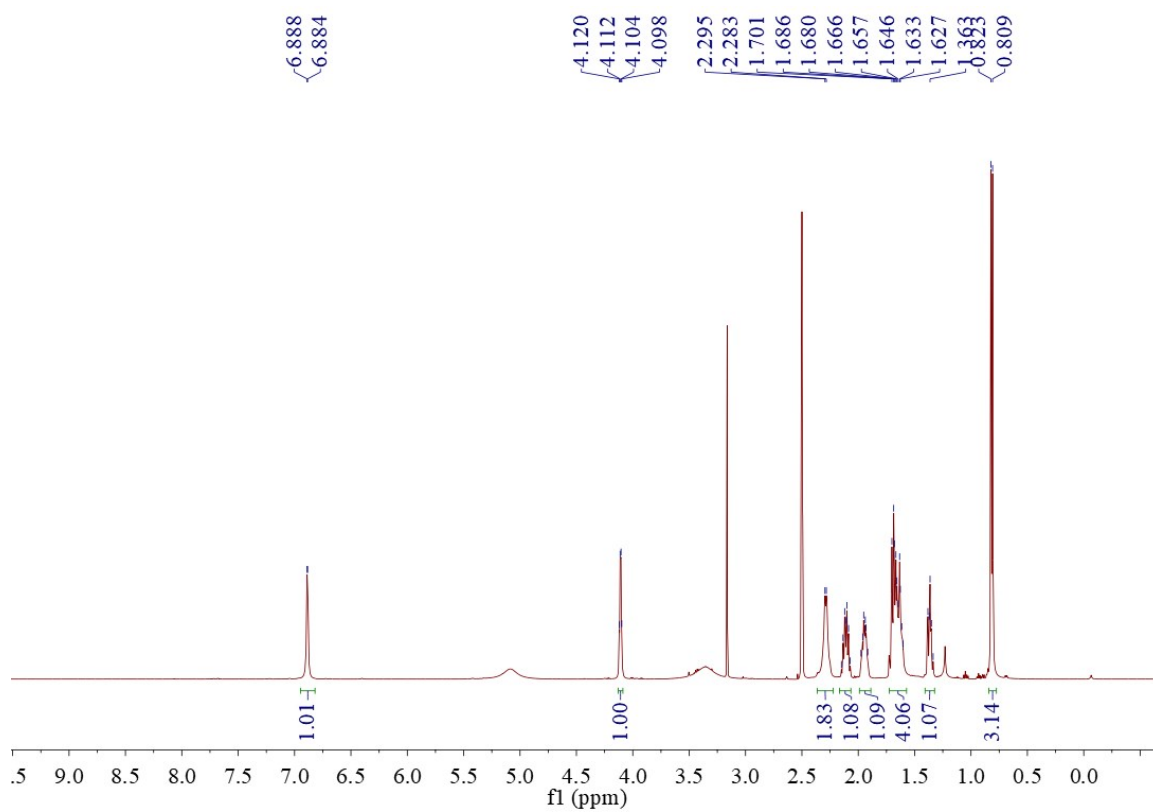

**Figure S3.** The <sup>1</sup>H NMR spectrum of compound **1** in DMSO-*d*<sub>6</sub>

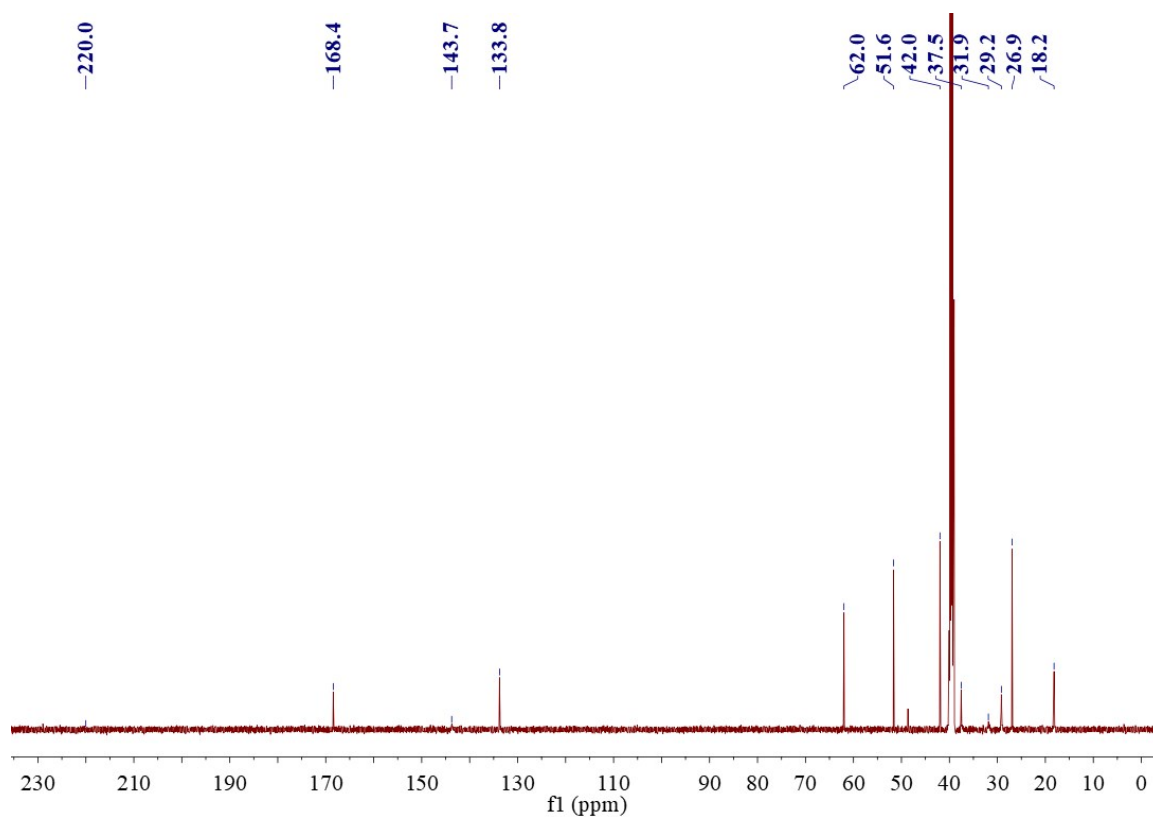

**Figure S4.** The <sup>13</sup>C NMR spectrum of compound **1** in DMSO-*d*<sub>6</sub>

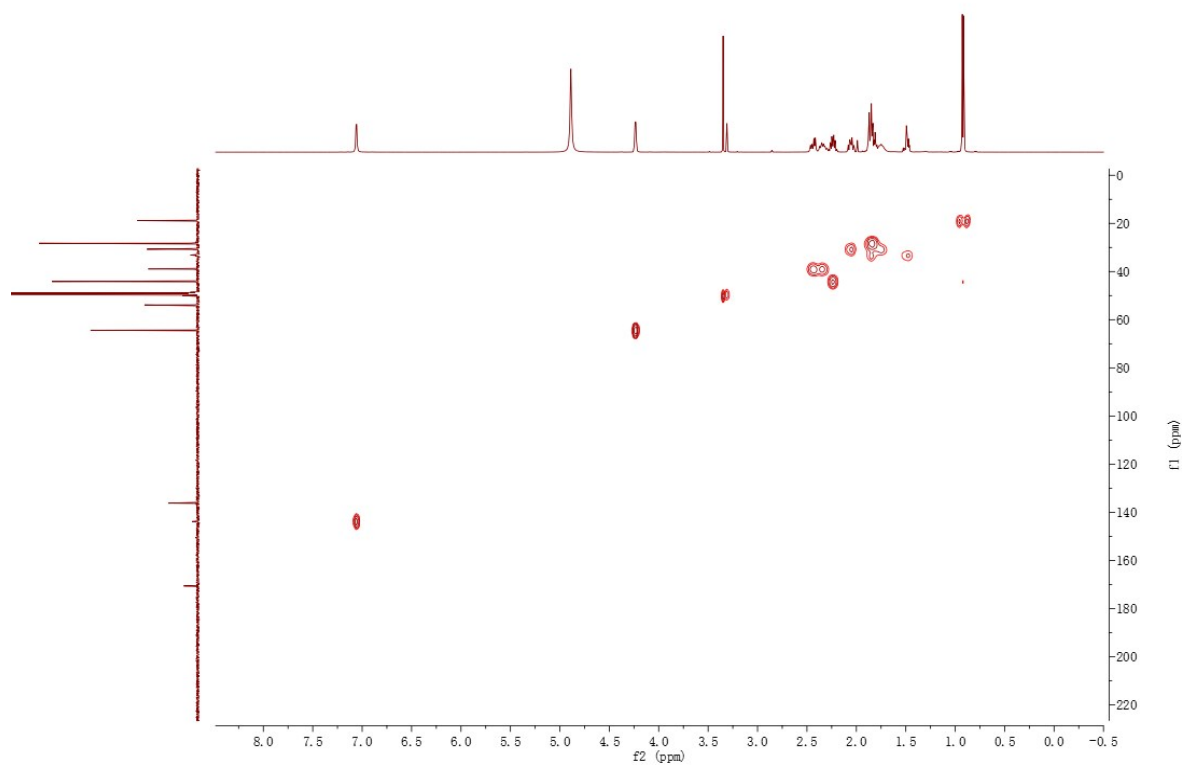

**Figure S5.** The HSQC spectrum of compound **1** in methanol- $d_4$

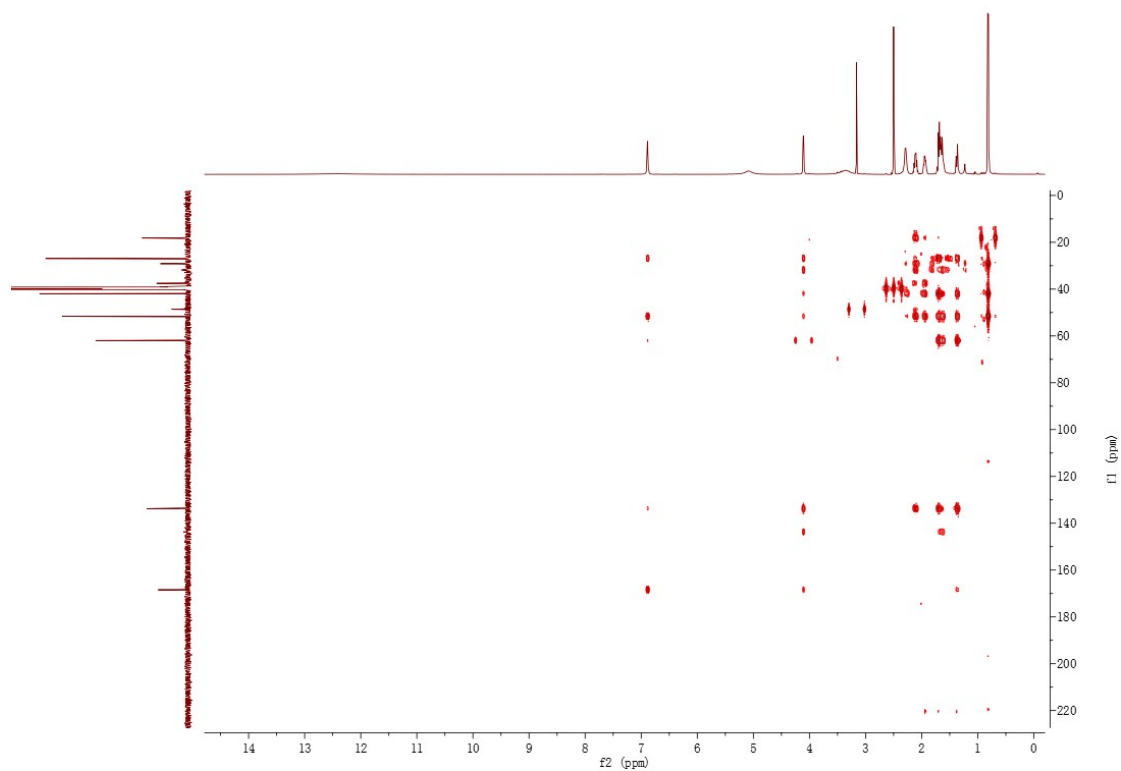

**Figure S6.** The HMBC spectrum of compound **1** in DMSO- $d_6$

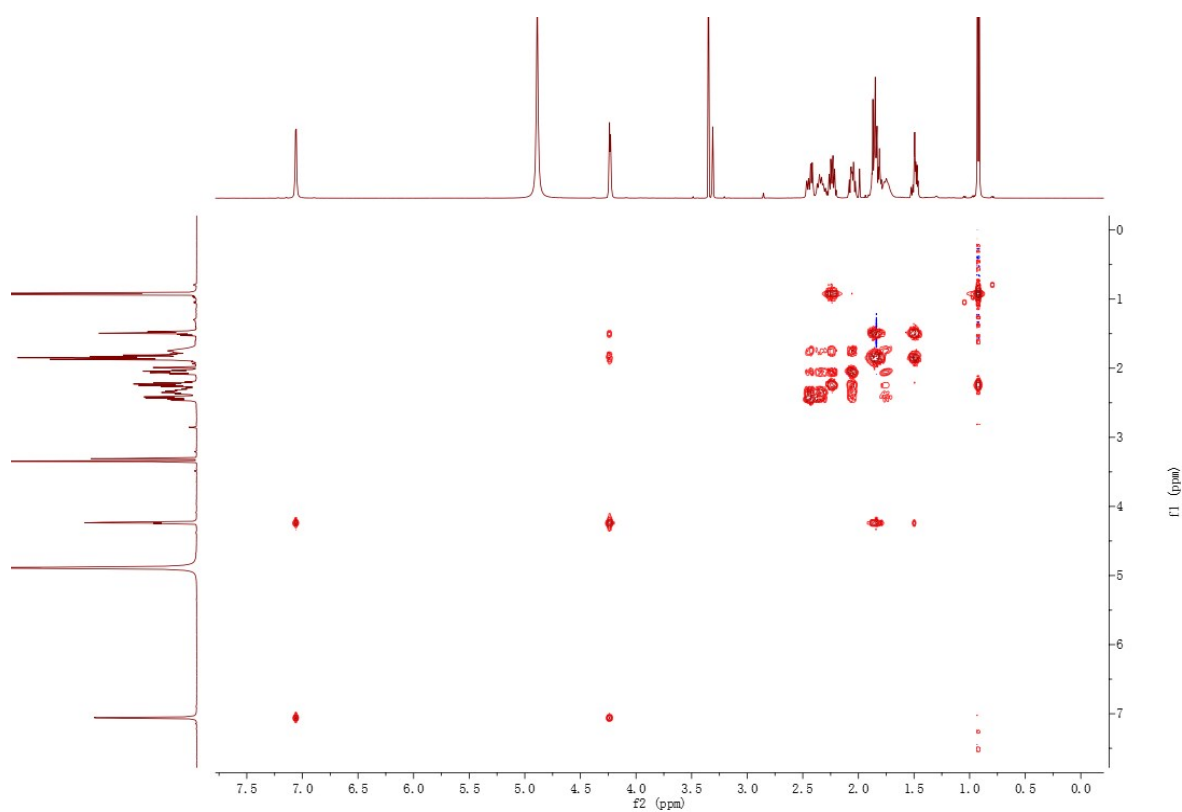

**Figure S7.** The  $^1\text{H}$ - $^1\text{H}$  COSY spectrum of compound **1** in methanol- $d_4$

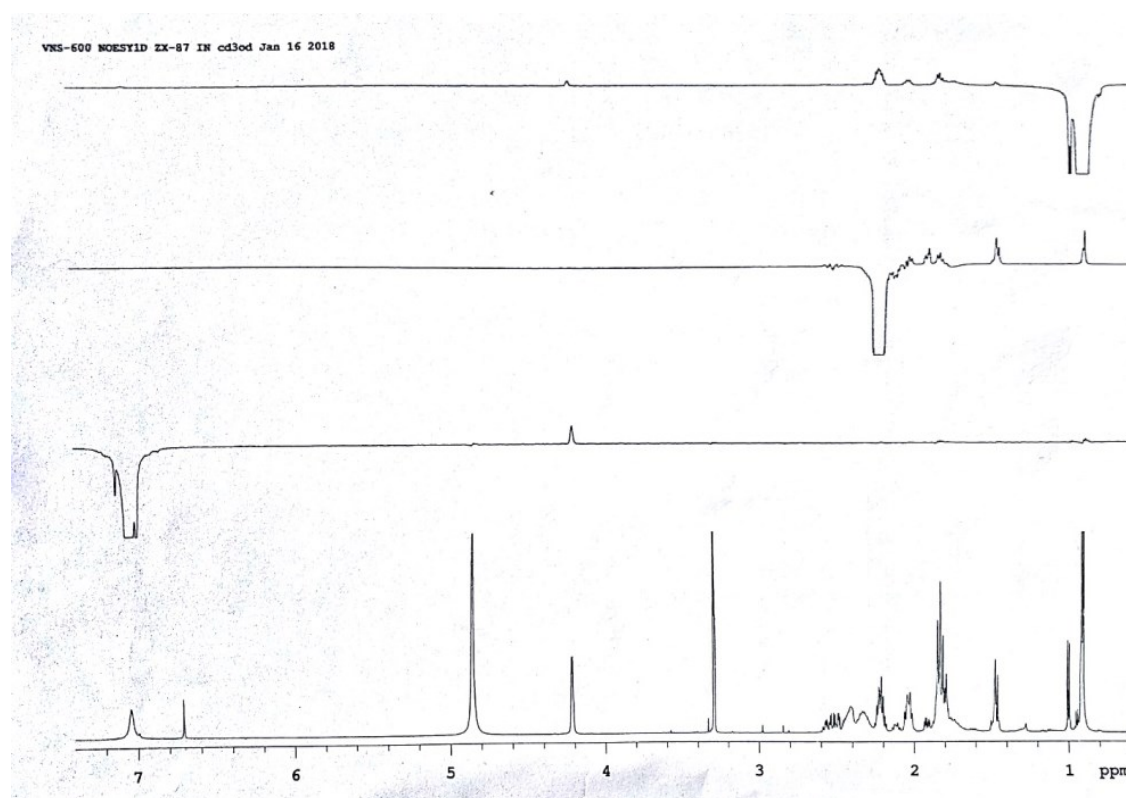

**Figure S8.** The 1D NOE spectrum of compound **1** in methanol- $d_4$

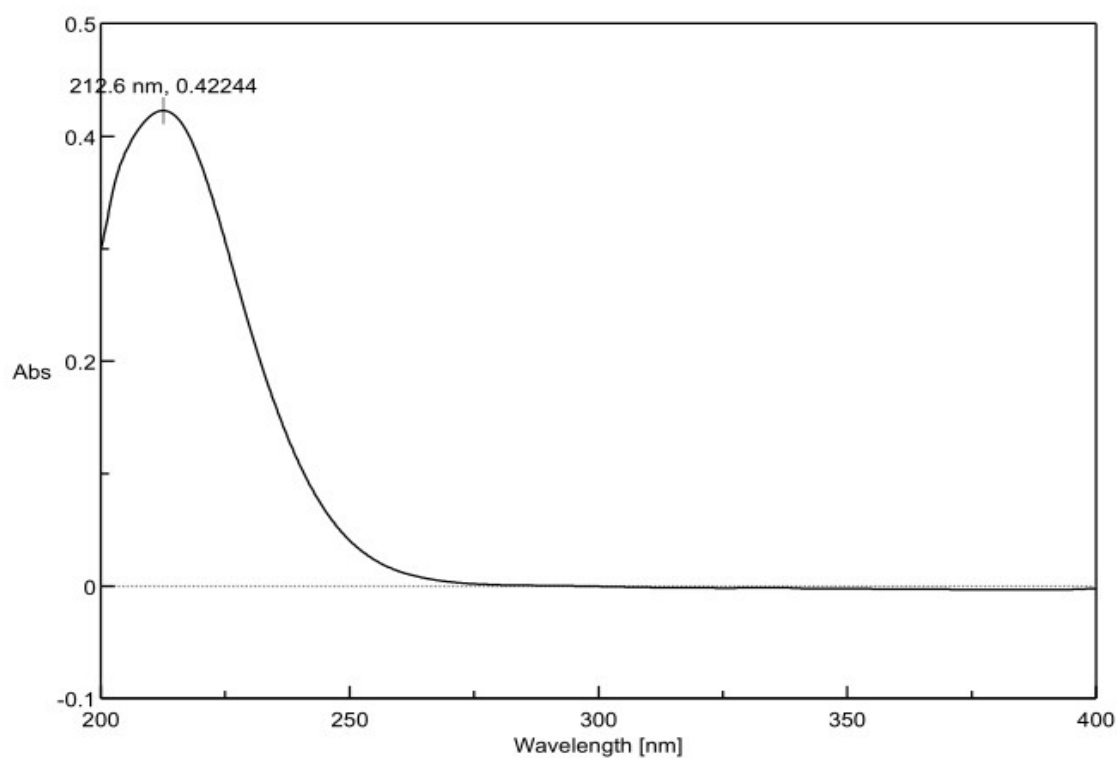

**Figure S9.** The UV spectrum of compound **1** in methanol

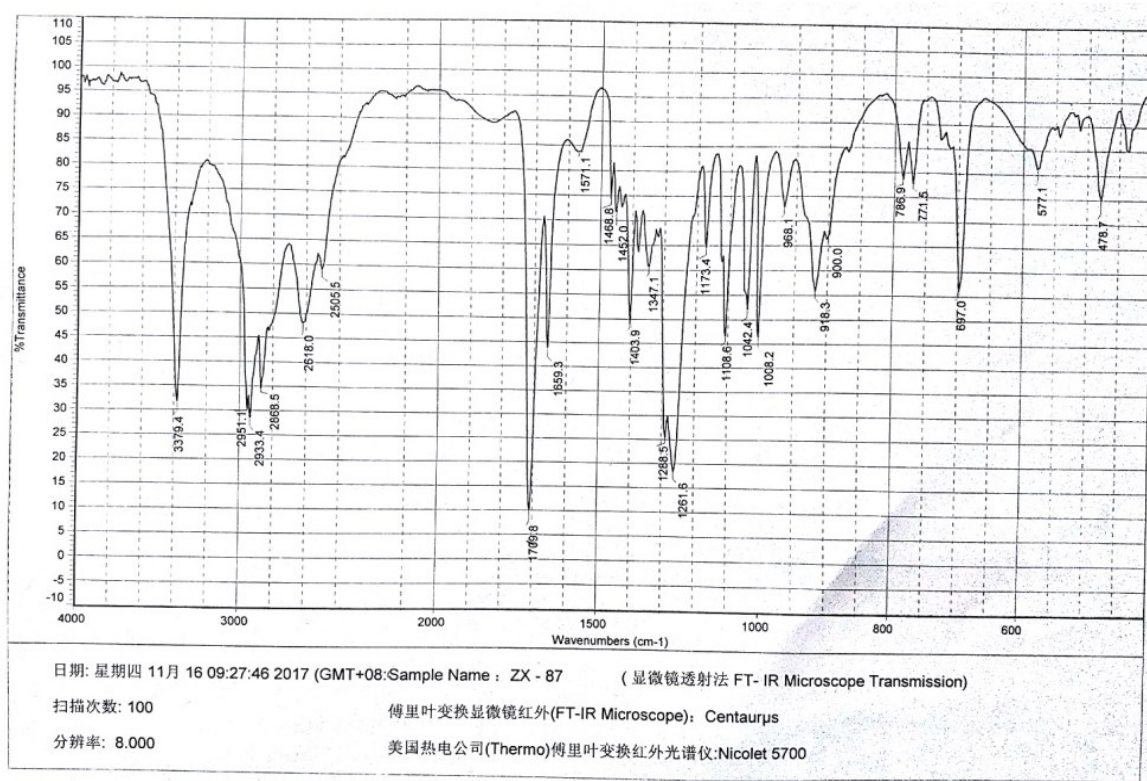

**Figure S10.** The IR spectrum (KBr) of compound **1**

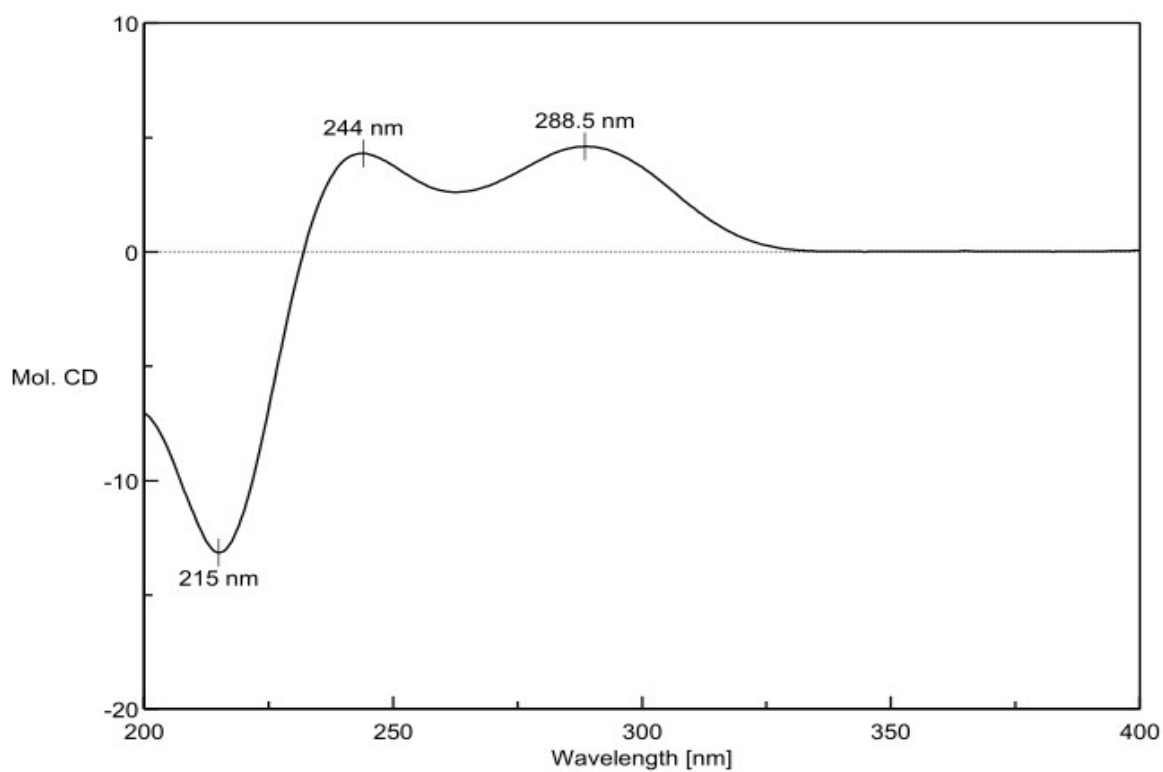

**Figure S11.** The ECD spectrum of compound **1a** in methanol

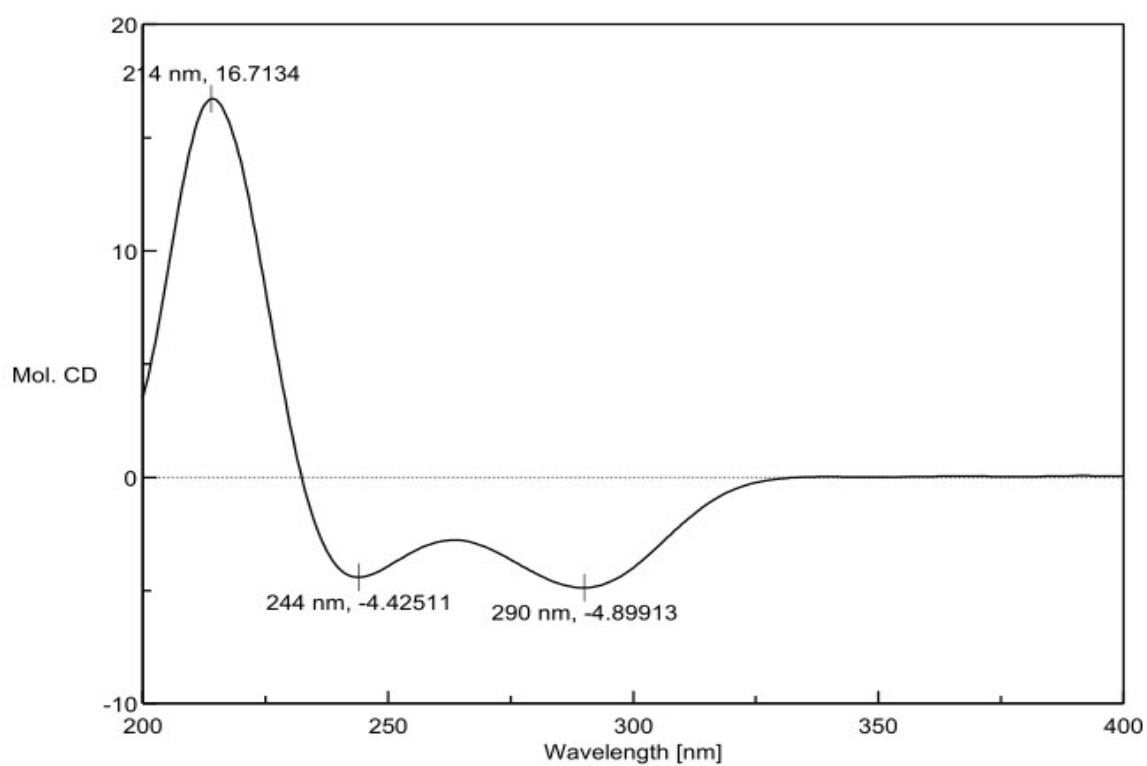

**Figure S12.** The ECD spectrum of compound **1b** in methanol

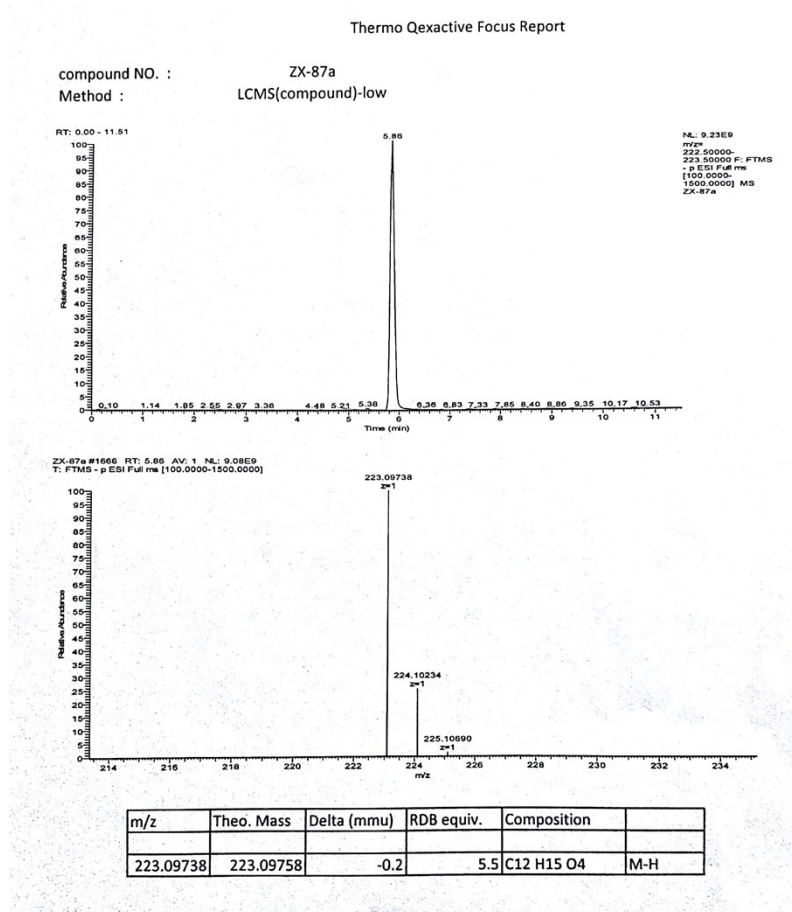

Figure S13. The HR-ESI-MS spectrum of compounds 1

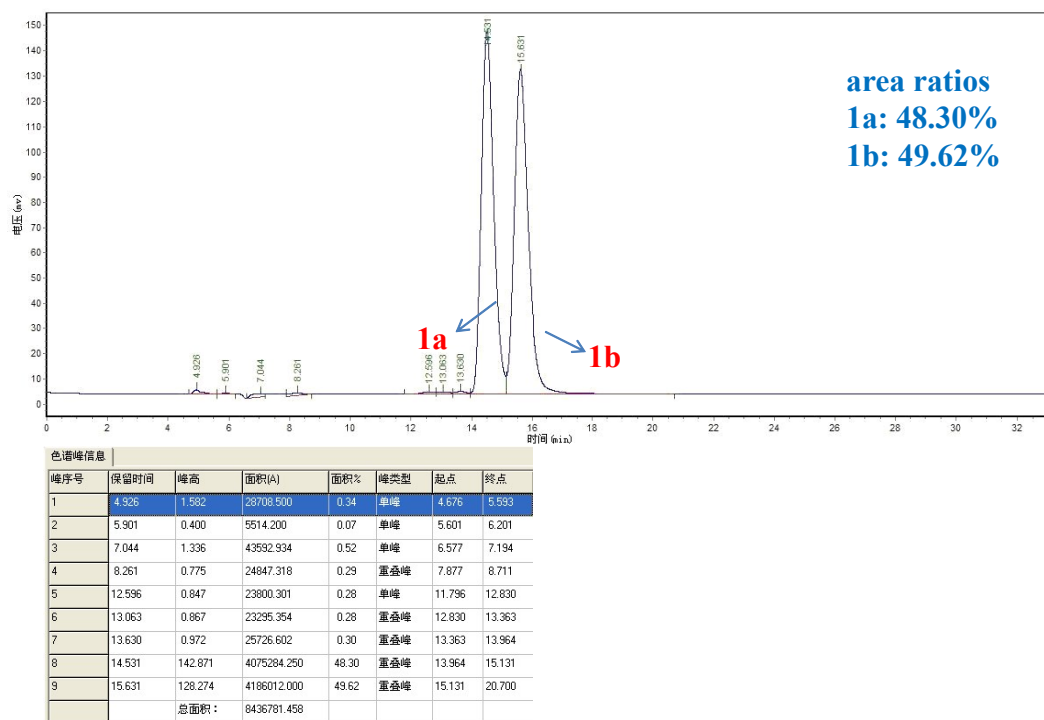

Figure S14. The Chiral separation on preparative HPLC of 1a and 1b

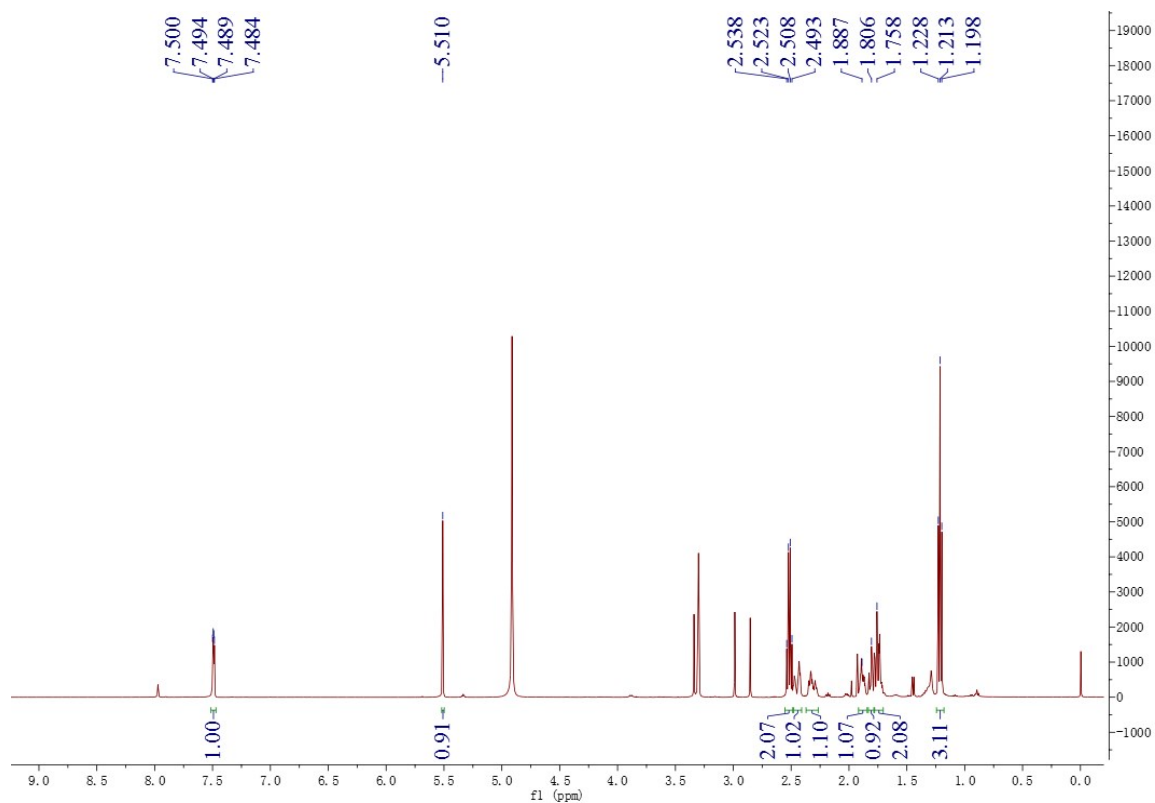

**Figure S15.** The <sup>1</sup>H NMR spectrum of compound **2** in methanol-*d*<sub>4</sub>

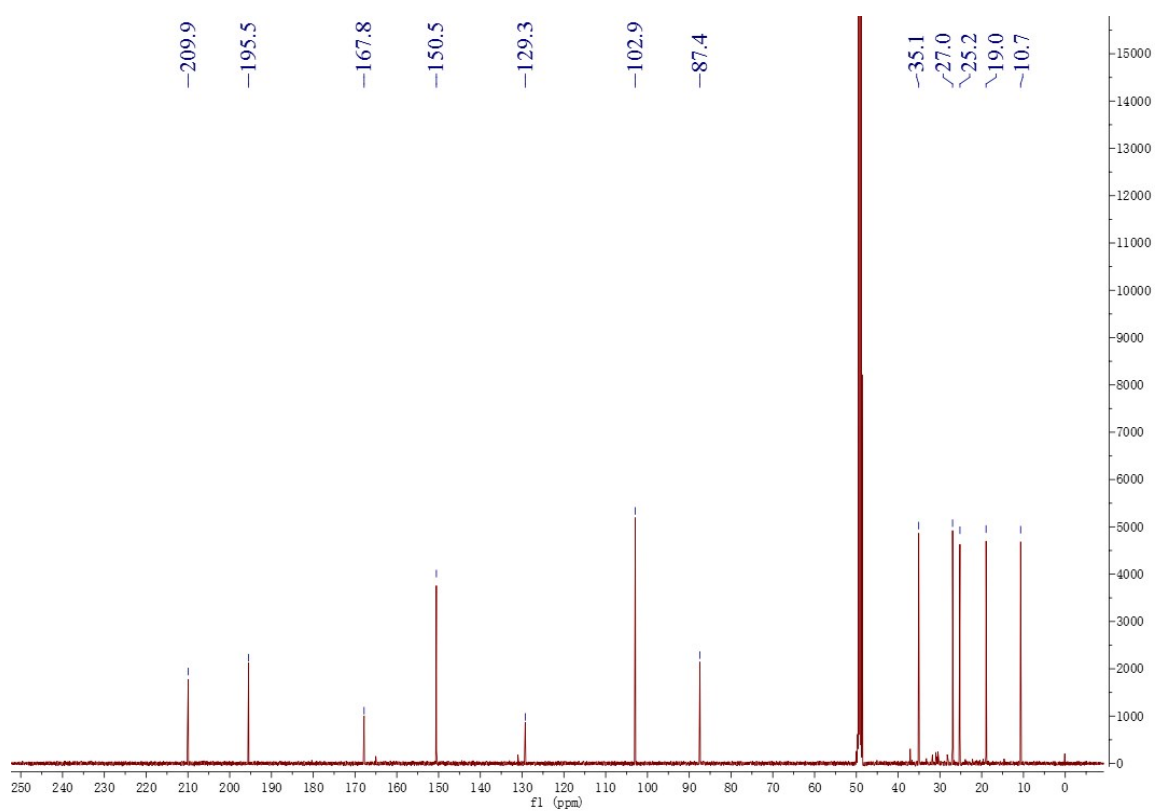

**Figure S16.** The <sup>13</sup>C NMR spectrum of compound **2** in methanol-*d*<sub>4</sub>

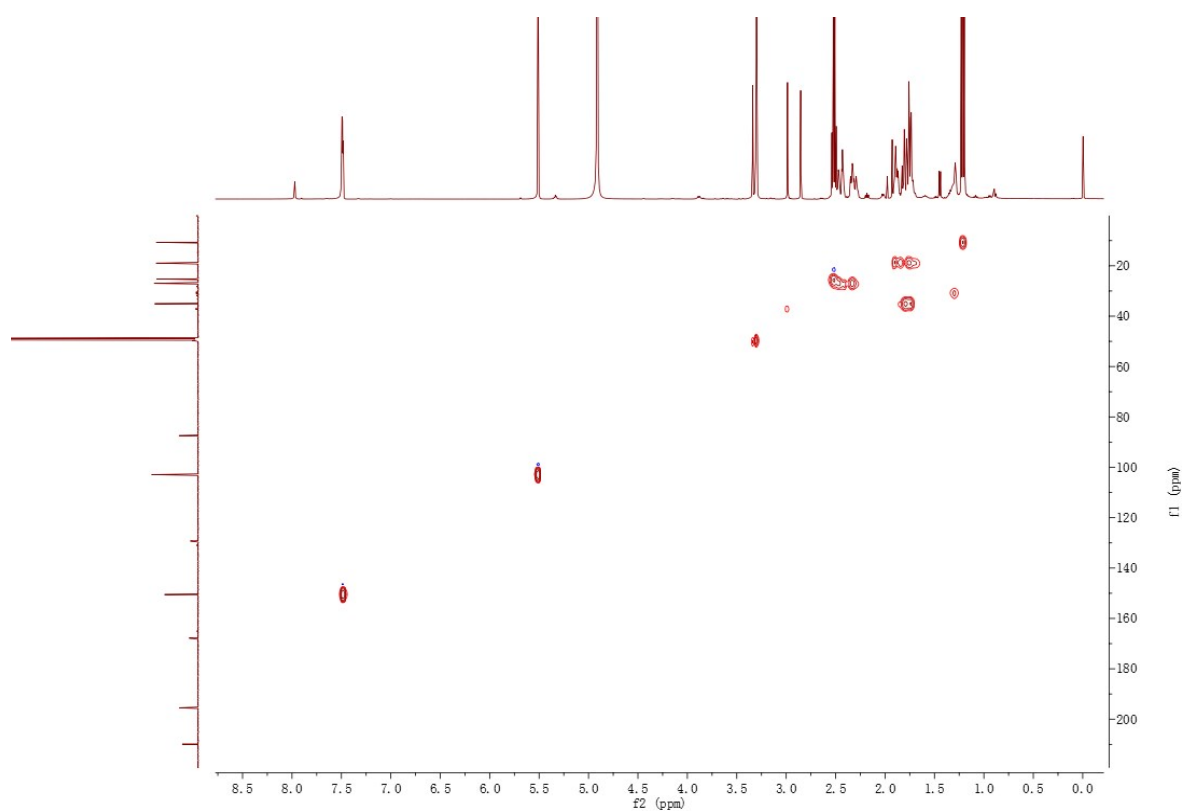

**Figure S17.** The HSQC spectrum of compound **2** in methanol- $d_4$

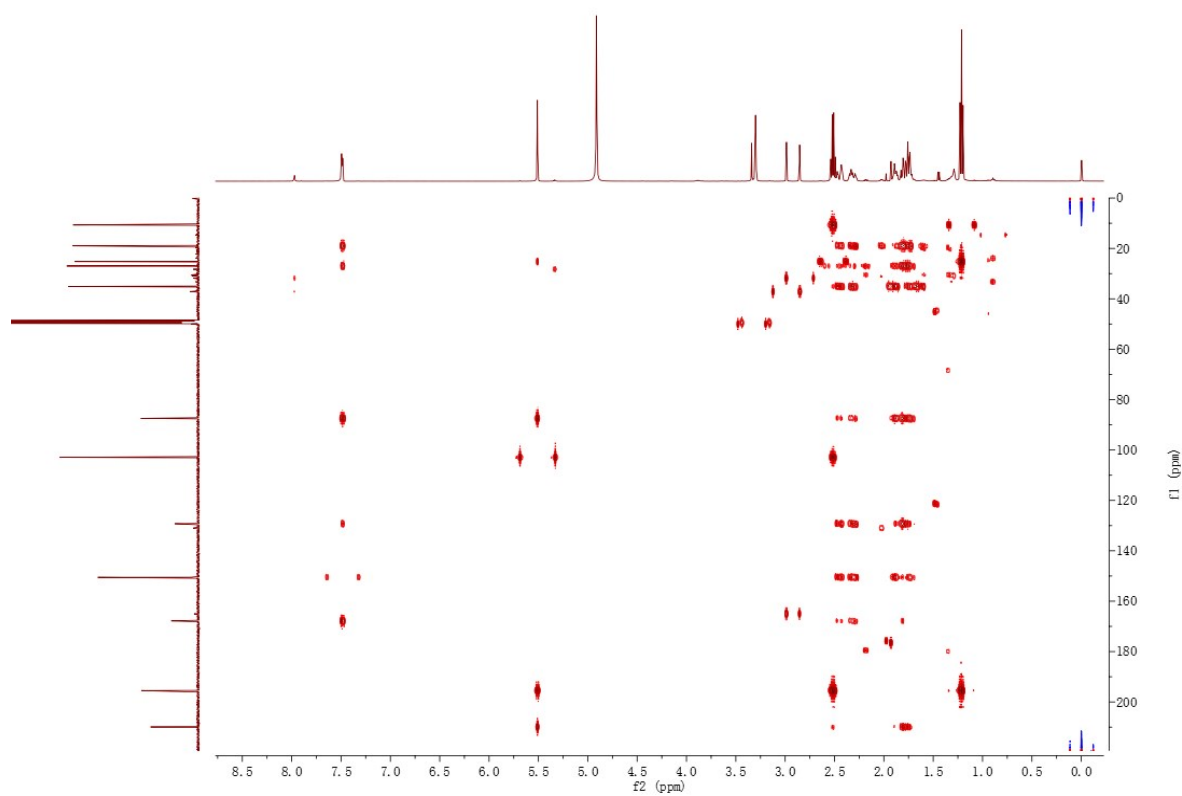

**Figure S18.** The HMBC spectrum of compound **2** in methanol- $d_4$

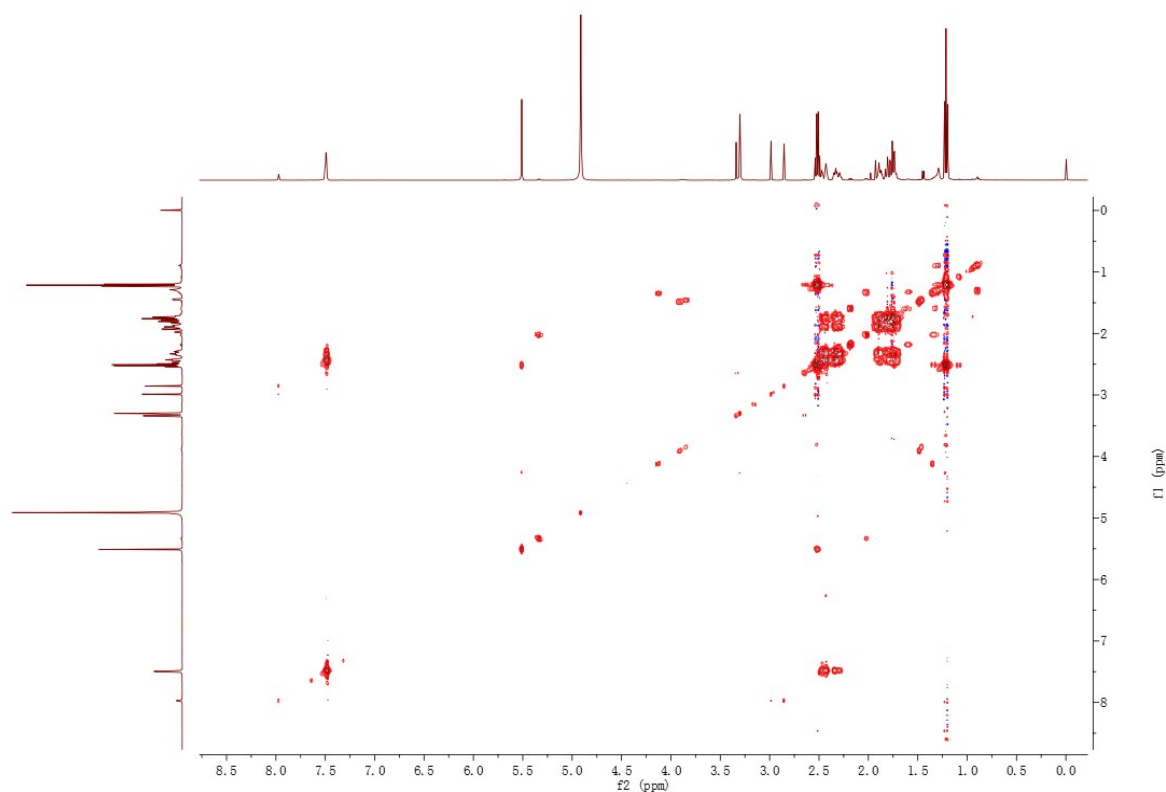

**Figure S19.** The  $^1\text{H}$ - $^1\text{H}$  COSY spectrum of compound **2** in methanol- $d_4$

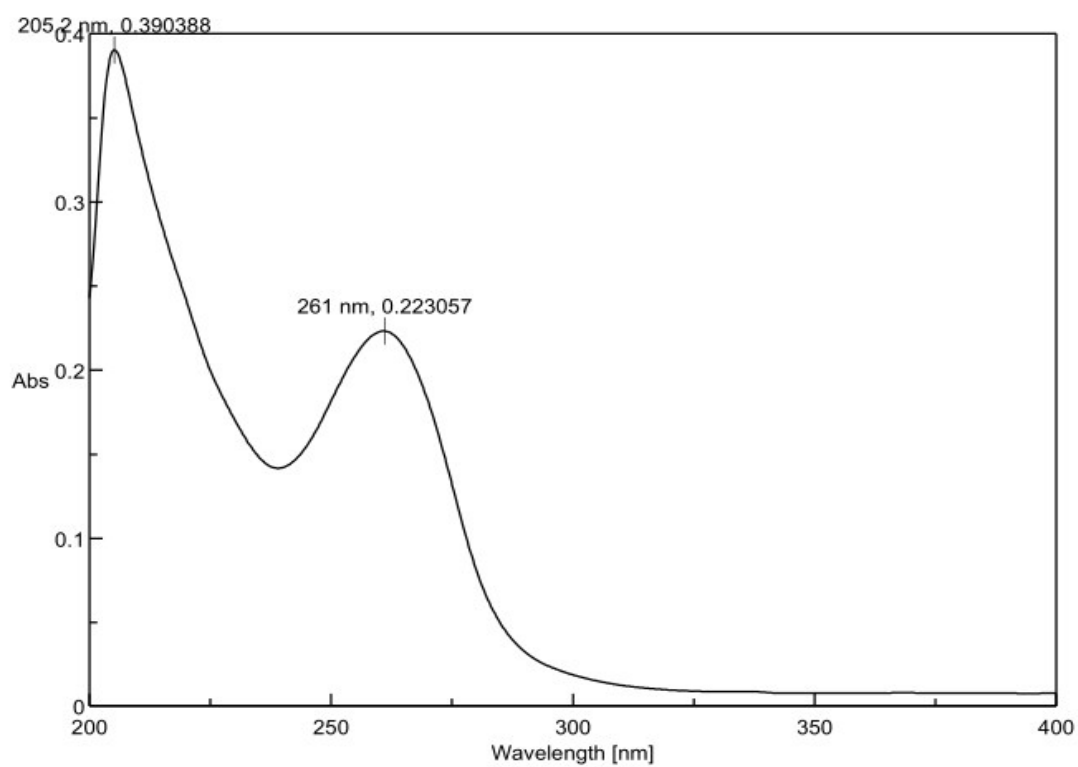

**Figure S20.** The UV spectrum of compound **2** in methanol

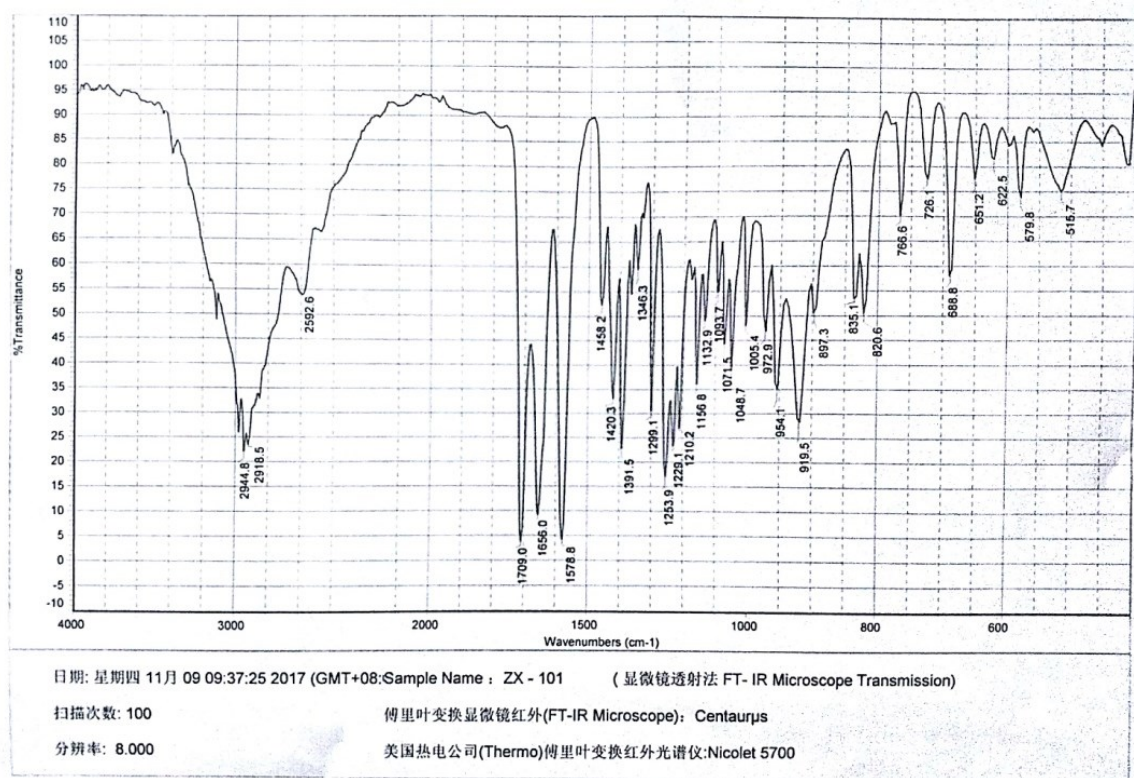

**Figure S21.** The IR spectrum (KBr) of compound **2**

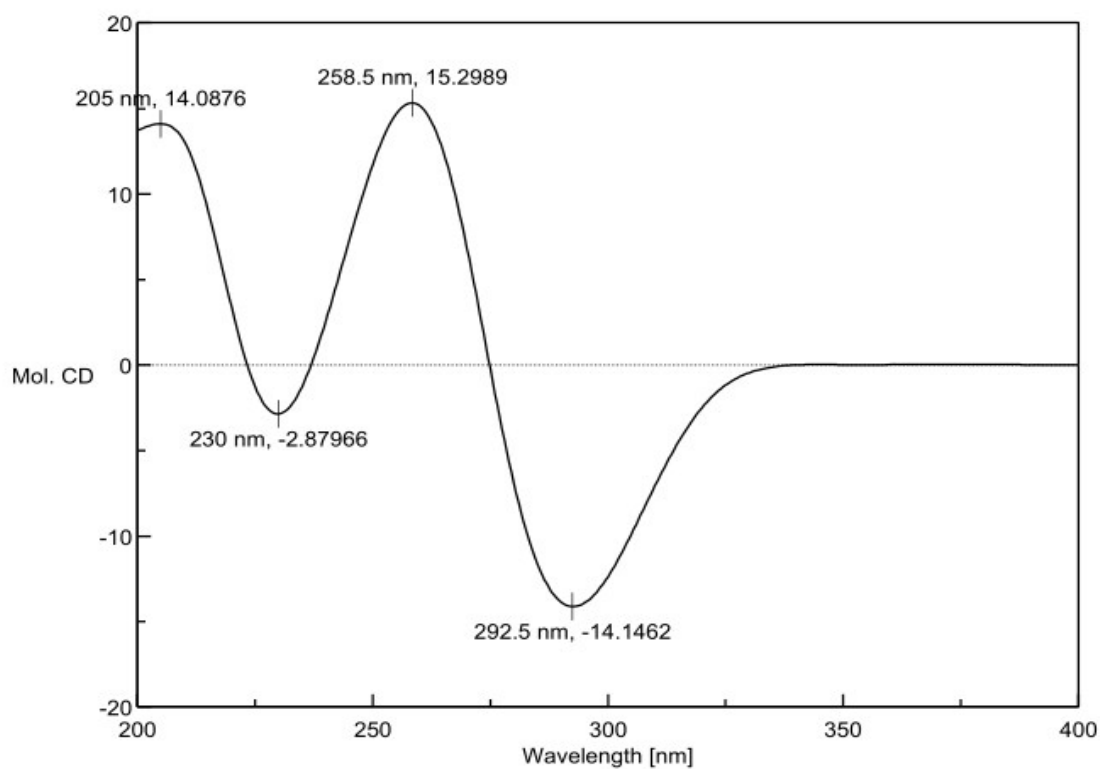

**Figure S22.** The ECD spectrum of compound **2a** in methanol

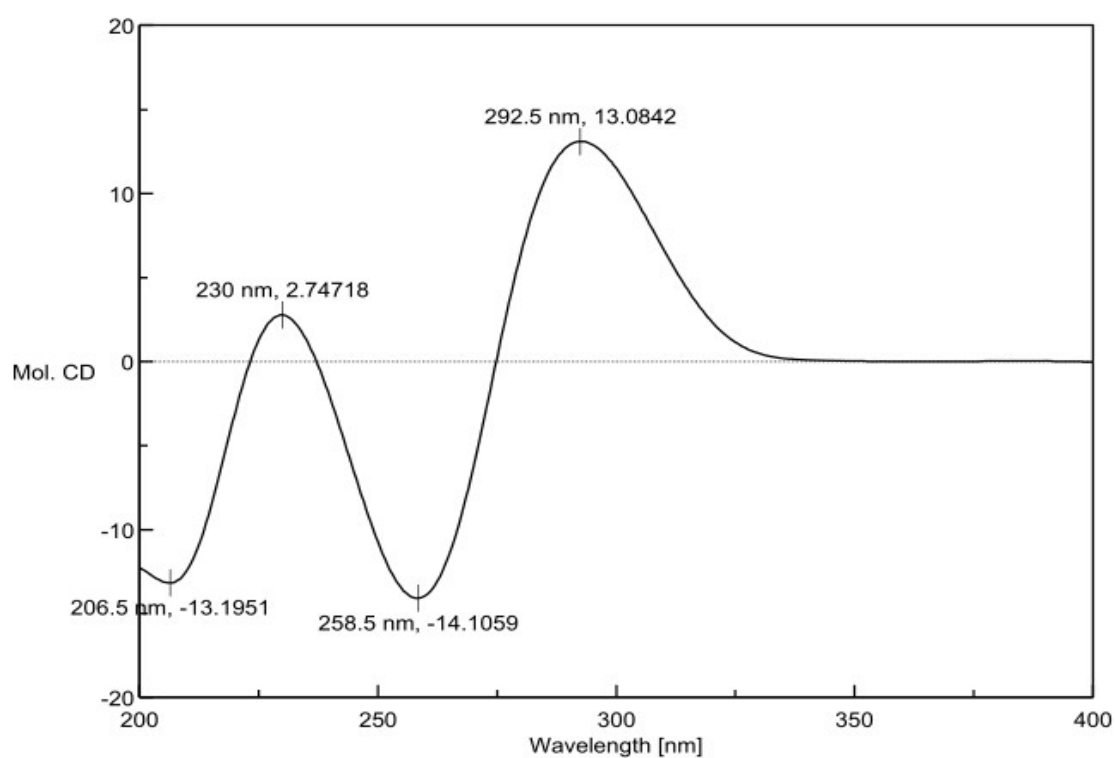

**Figure S23.** The ECD spectrum of compound **2b** in methanol

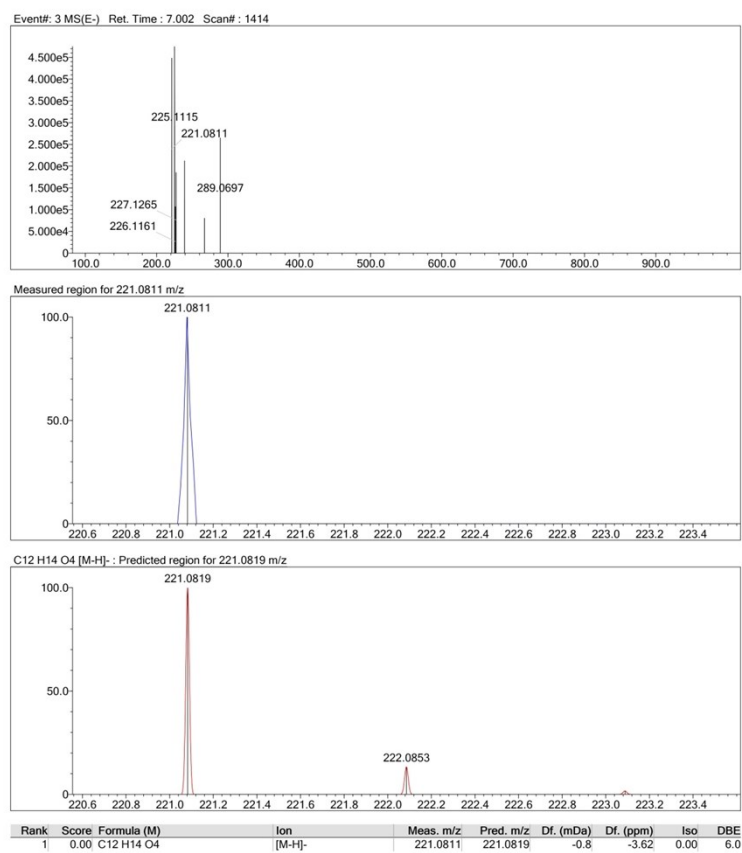

**Figure S24.** The HR-ESI-MS data of compound **2** (negative ion)

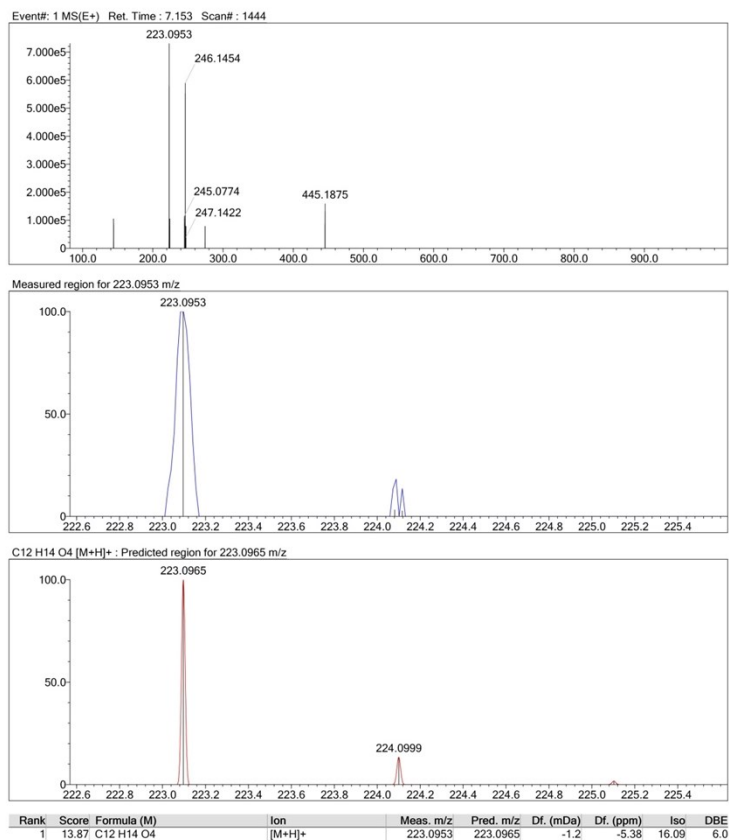

Figure S25. The HR-ESI-MS data of compound **2** (positive ion)

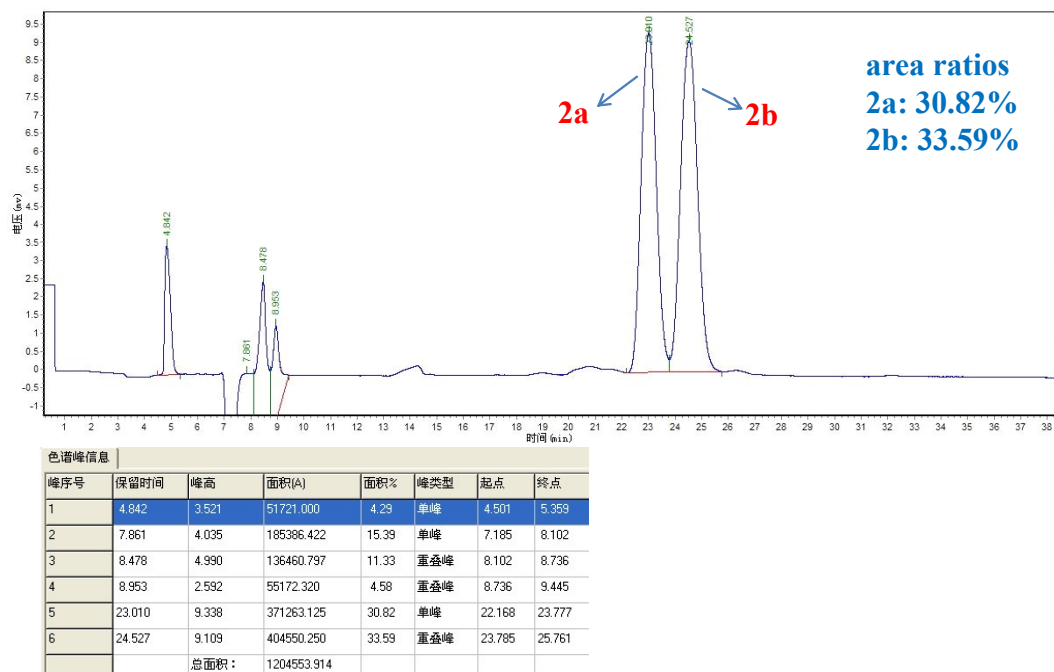

Figure S26. The Chiral separation on preparative HPLC of **2a** and **2b**

**Table S1.** Seven optimized conformations of **1a** (1*S*,2*R*,9*S*).

| NO. | conformer                                                                           | E (kJ/mol) | rel.E (kJ/mol) | Boltzmann Dist |
|-----|-------------------------------------------------------------------------------------|------------|----------------|----------------|
| 1   | 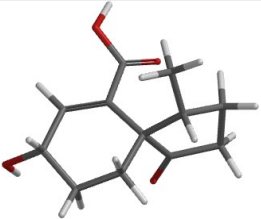   | -61.82     | 0.00           | 0.458          |
| 2   | 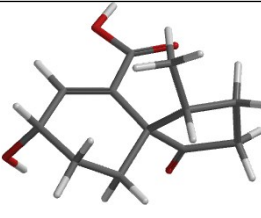   | -61.00     | 0.82           | 0.329          |
| 3   | 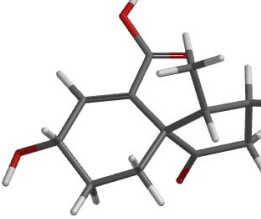 | -56.98     | 4.84           | 0.065          |
| 4   | 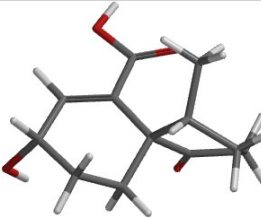 | -56.22     | 5.61           | 0.048          |
| 5   | 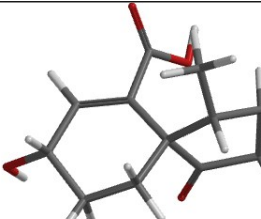 | -55.35     | 6.47           | 0.034          |
| 6   | 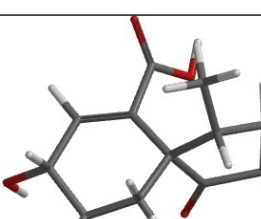 | -54.72     | 7.11           | 0.026          |

|   |                                                                                   |        |      |       |
|---|-----------------------------------------------------------------------------------|--------|------|-------|
| 7 | 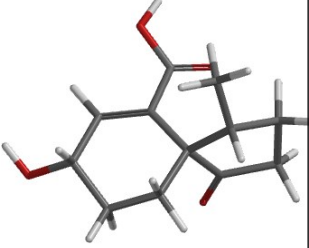 | -52.92 | 8.90 | 0.013 |
|---|-----------------------------------------------------------------------------------|--------|------|-------|

**Table S2.** Seven optimized conformations of **2a** (2a*R*).

| NO. | conformer                                                                           | E (kJ/mol) | rel.E (kJ/mol) | Boltzmann Dist |
|-----|-------------------------------------------------------------------------------------|------------|----------------|----------------|
| 1   | 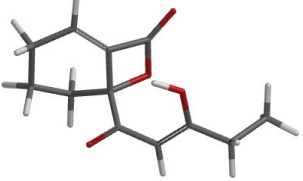   | 392.45     | 0.00           | 0.468          |
| 2   | 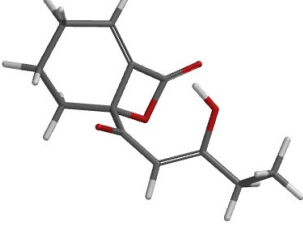  | 393.92     | 1.47           | 0.259          |
| 3   | 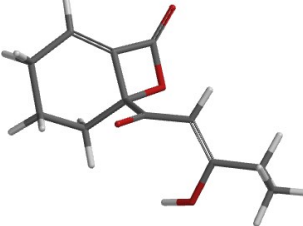 | 396.33     | 3.88           | 0.098          |
| 4   | 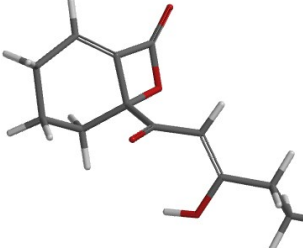 | 397.13     | 4.68           | 0.071          |
| 5   | 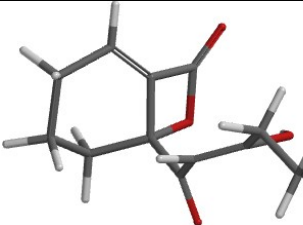 | 398.69     | 6.24           | 0.038          |

|   |                                                                                   |        |      |       |
|---|-----------------------------------------------------------------------------------|--------|------|-------|
| 6 | 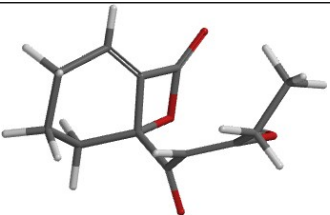 | 399.57 | 7.12 | 0.026 |
| 7 | 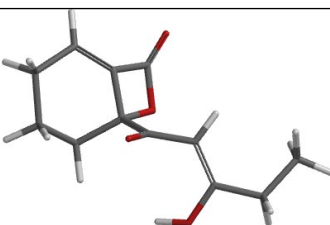 | 399.65 | 7.20 | 0.026 |
